# Supplementary material for: Transcriptional Profiling of mRNAs and microRNAs in Human Bone Marrow Precursor B Cells Identifies Subset- and Age-Specific Variations
Source: PubMed Central journal article supplement (PMC3728296; doi:10.1371/journal.pone.0070721), 2013-07-30
Supplement: pone.0070721.s011.pdf [file pone.0070721.s011.pdf]

Analysis Name: Child ProB vs Adult ProB

Analysis Creation Date: 2013-06-09

Build version: 220217

Content version: 16542223 (Release Date: 2013-05-13)

## Analysis settings

[View](#)

Reference set: Ingenuity Knowledge Base (Genes Only)

Relationship to include: Direct and Indirect

Includes Endogenous Chemicals

Optional Analyses: My Pathways My List

Filter Summary:

Consider only molecules and/or relationships where

(species = Rat OR Human OR Mouse) AND

(confidence = Experimentally Observed OR High (predicted))

Cutoff:

## Top Networks

| ID | Associated Network Functions                                  | Score |
|----|---------------------------------------------------------------|-------|
| 1  | Molecular Transport, Hematological Disease, Metabolic Disease | 33    |
| 2  | Cell Cycle, Connective Tissue Disorders, Dental Disease       | 30    |

|   |                                                                                   |    |
|---|-----------------------------------------------------------------------------------|----|
| 3 | Cancer, Cellular Movement, Embryonic Development                                  | 23 |
| 4 | Cellular Assembly and Organization, Neurological Disease, Free Radical Scavenging | 16 |
| 5 | Cell-To-Cell Signaling and Interaction, Cellular Movement, Molecular Transport    | 14 |

## Top Bio Functions

### Diseases and Disorders

| Name                                   | p-value             | # Molecules |
|----------------------------------------|---------------------|-------------|
| Gastrointestinal Disease               | 1,52E-06 - 6,52E-03 | 22          |
| Immunological Disease                  | 1,52E-06 - 4,27E-03 | 8           |
| Ophthalmic Disease                     | 1,52E-06 - 6,52E-03 | 7           |
| Cancer                                 | 2,29E-06 - 7,55E-03 | 41          |
| Dermatological Diseases and Conditions | 2,29E-06 - 4,27E-03 | 17          |

### Molecular and Cellular Functions

| Name                                   | p-value             | # Molecules |
|----------------------------------------|---------------------|-------------|
| Molecular Transport                    | 3,64E-07 - 7,58E-03 | 15          |
| Cellular Movement                      | 3,67E-06 - 7,18E-03 | 20          |
| Cellular Development                   | 8,47E-06 - 7,58E-03 | 22          |
| Cellular Growth and Proliferation      | 8,47E-06 - 7,58E-03 | 28          |
| Cell-To-Cell Signaling and Interaction | 9,23E-06 - 7,08E-03 | 23          |

### Physiological System Development and Function

| Name                                          | p-value             | # Molecules |
|-----------------------------------------------|---------------------|-------------|
| Tissue Development                            | 9,23E-06 - 7,58E-03 | 19          |
| Tumor Morphology                              | 9,45E-06 - 6,52E-03 | 10          |
| Hematological System Development and Function | 1,05E-05 - 7,18E-03 | 18          |
| Hematopoiesis                                 | 1,05E-05 - 6,52E-03 | 7           |
| Humoral Immune Response                       | 1,05E-05 - 6,52E-03 | 3           |

## Top Canonical Pathways

| Name                                                                           | p-value  | Ratio         |
|--------------------------------------------------------------------------------|----------|---------------|
| Acute Phase Response Signaling                                                 | 2,25E-03 | 4/174 (0,023) |
| Agranulocyte Adhesion and Diapedesis                                           | 3,05E-03 | 4/186 (0,022) |
| Role of Macrophages, Fibroblasts and Endothelial Cells in Rheumatoid Arthritis | 3,14E-03 | 5/329 (0,015) |
| Leukocyte Extravasation Signaling                                              | 3,97E-03 | 4/201 (0,02)  |
| 4-aminobutyrate Degradation I                                                  | 9,77E-03 | 1/3 (0,333)   |

## Top Molecules

## Fold Change up-regulated

| Molecules       | Exp. Value | Exp. Chart |
|-----------------|------------|------------|
| IGF2BP3         | ↑7,400     |            |
| NDUFAF2         | ↑5,043     |            |
| FOXD4L3/FOXD4L6 | ↑3,303     |            |
| ANKRD36B        | ↑2,948     |            |
| ZNF417/ZNF587   | ↑2,769     |            |
| ARL17A          | ↑2,531     |            |
| ENPP2           | ↑2,326     |            |
| FXYD6           | ↑2,306     |            |
| RBMS2           | ↑2,249     |            |
| PRSS3           | ↑2,247     |            |

## Fold Change down-regulated

| Molecules | Exp. Value | Exp. Chart |
|-----------|------------|------------|
| HBB       | ↓7,552     |            |
| CXCL12    | ↓4,790     |            |
| ANXA1     | ↓4,311     |            |

|               |         |
|---------------|---------|
| RGS1          | ↓-3,989 |
| IGK           | ↓-3,843 |
| FAM127A       | ↓-3,837 |
| ZNF208/ZNF729 | ↓-3,753 |
| GJA1          | ↓-3,561 |
| CDH2          | ↓-3,357 |
| RGS2          | ↓-3,324 |

### Top Upstream Regulators

| Upstream Regulator | p-value of overlap | Predicted Activation State |
|--------------------|--------------------|----------------------------|
| EDN1               | 7,36E-08           |                            |
| TGFB1              | 1,80E-07           |                            |
| TAZ                | 1,08E-06           |                            |
| TNF                | 2,02E-06           |                            |
| STAT3              | 2,96E-06           |                            |

## Top My Lists

| Name                                               | p-value  | Ratio         |
|----------------------------------------------------|----------|---------------|
| PreBI vs PreBIIL-miR target filter_cell cycle_adul | 4,72E-04 | 4/111 (0,036) |
| PreBI vs PreBII_miR target filter_cell cycle_ID2_c | 1,12E-02 | 2/51 (0,039)  |
| PreBI vs PreBII L barn_miR_utvidet mRNA_Core TFs   | 3,54E-02 | 1/16 (0,062)  |
| PreBI vs PreBII_miR and mRNA_network1_adults       | 9,95E-02 | 1/34 (0,029)  |
| PreBI vs PreBIIL_miR_and mRNA_utvidet_adults       | 1,59E-01 | 1/60 (0,017)  |

## Top My Pathways

| Name                                       | p-value  | Ratio        |
|--------------------------------------------|----------|--------------|
| PreBI vs PreBII L_miR og mRNA_core TF_barn | 6,64E-02 | 1/26 (0,038) |
| PreBI vs PreBIIL_miRs and mRNA_voksne      | 1,59E-01 | 1/60 (0,017) |

## Top Tox Lists

| Name                                                        | p-value  | Ratio         |
|-------------------------------------------------------------|----------|---------------|
| Genes associated with Chronic Allograft Nephropathy (Human) | 2,11E-03 | 2/21 (0,095)  |
| Acute Renal Failure Panel (Rat)                             | 1,75E-02 | 2/62 (0,032)  |
| Renal Inorganic Phosphate Homeostasis (Mouse)               | 1,94E-02 | 1/6 (0,167)   |
| Negative Acute Phase Response Proteins                      | 2,58E-02 | 1/8 (0,125)   |
| Liver Proliferation                                         | 2,9E-02  | 3/204 (0,015) |

## Top Tox Functions

### Assays: Clinical Chemistry and Hematology

| Name                                                | p-value             | # Molecules |
|-----------------------------------------------------|---------------------|-------------|
| <a href="#">Increased Levels of Red Blood Cells</a> | 2,70E-01 - 2,70E-01 | 1           |
| <a href="#">Increased Levels of Hematocrit</a>      | 2,73E-01 - 2,73E-01 | 1           |

### Cardiotoxicity

| Name                                  | p-value             | # Molecules |
|---------------------------------------|---------------------|-------------|
| <a href="#">Cardiac Proliferation</a> | 3,27E-03 - 2,13E-01 | 1           |
| <a href="#">Cardiac Dysfunction</a>   | 9,77E-03 - 1,62E-02 | 1           |
| <a href="#">Cardiac Inflammation</a>  | 9,77E-03 - 9,77E-03 | 1           |
| <a href="#">Cardiac Fibrosis</a>      | 2,26E-02 - 3,14E-01 | 2           |
| <a href="#">Cardiac Stenosis</a>      | 2,26E-02 - 2,26E-02 | 1           |

### Hepatotoxicity

| Name                                                 | p-value             | # Molecules |
|------------------------------------------------------|---------------------|-------------|
| <a href="#">Liver Fibrosis</a>                       | 3,22E-04 - 1,62E-02 | 4           |
| <a href="#">Liver Proliferation</a>                  | 3,22E-04 - 4,48E-02 | 3           |
| <a href="#">Hepatocellular Carcinoma</a>             | 1,25E-02 - 7,05E-02 | 4           |
| <a href="#">Liver Hyperplasia/Hyperproliferation</a> | 1,25E-02 - 7,05E-02 | 6           |
| <a href="#">Liver Cholestasis</a>                    | 1,30E-02 - 1,94E-02 | 1           |

### Nephrotoxicity

| Name                              | p-value             | # Molecules |
|-----------------------------------|---------------------|-------------|
| <a href="#">Glomerular Injury</a> | 3,27E-03 - 7,25E-02 | 2           |
| <a href="#">Renal Hypertrophy</a> | 3,22E-02 - 7,25E-02 | 2           |
| <a href="#">Renal Damage</a>      | 3,71E-02 - 8,76E-02 | 3           |

Renal Tubule Injury

3,71E-02 - 8,76E-02 3

Renal Inflammation

4,79E-02 - 2,70E-01 1



Analysis Name: Child PreBI vs Adult PreBI

Analysis Creation Date: 2013-06-09

Build version: 220217

Content version: 16542223 (Release Date: 2013-05-13)

## Analysis settings

[View](#)

Reference set: Ingenuity Knowledge Base (Genes Only)

Relationship to include: Direct and Indirect

Includes Endogenous Chemicals

Optional Analyses: My Pathways My List

Filter Summary:

Consider only molecules and/or relationships where

(species = Rat OR Human OR Mouse) AND

(confidence = Experimentally Observed OR High (predicted))

Cutoff:

## Top Networks

| ID | Associated Network Functions                                                                               | Score |
|----|------------------------------------------------------------------------------------------------------------|-------|
| 1  | Cardiovascular System Development and Function, Cell-To-Cell Signaling and Interaction, Tissue Development | 36    |
| 2  | Cell Death and Survival, Cancer, Endocrine System Disorders                                                | 33    |

|   |                                                                                           |    |
|---|-------------------------------------------------------------------------------------------|----|
| 3 | Cellular Function and Maintenance, Post-Translational Modification, Protein Folding       | 30 |
| 4 | Cellular Movement, Hematological System Development and Function, Humoral Immune Response | 14 |
| 5 | Cardiovascular Disease, Developmental Disorder, Hereditary Disorder                       | 14 |

## Top Bio Functions

### Diseases and Disorders

| Name                        | p-value             | # Molecules |
|-----------------------------|---------------------|-------------|
| Infectious Disease          | 3,28E-04 - 2,40E-02 | 20          |
| Cancer                      | 4,00E-04 - 2,99E-02 | 12          |
| Respiratory Disease         | 4,00E-04 - 2,70E-02 | 3           |
| Connective Tissue Disorders | 5,08E-04 - 2,10E-02 | 12          |
| Immunological Disease       | 5,08E-04 - 2,70E-02 | 13          |

### Molecular and Cellular Functions

| Name                                   | p-value             | # Molecules |
|----------------------------------------|---------------------|-------------|
| Cell-To-Cell Signaling and Interaction | 9,10E-05 - 2,99E-02 | 11          |
| Cellular Movement                      | 1,34E-04 - 2,99E-02 | 13          |
| Cellular Development                   | 1,88E-04 - 2,99E-02 | 9           |
| Cellular Function and Maintenance      | 1,88E-04 - 2,99E-02 | 11          |
| Cellular Growth and Proliferation      | 1,88E-04 - 2,99E-02 | 9           |

### Physiological System Development and Function

| Name                                           | p-value             | # Molecules |
|------------------------------------------------|---------------------|-------------|
| Cardiovascular System Development and Function | 9,10E-05 - 2,99E-02 | 8           |
| Tissue Development                             | 9,10E-05 - 2,99E-02 | 12          |
| Connective Tissue Development and Function     | 1,34E-04 - 2,70E-02 | 7           |
| Cell-mediated Immune Response                  | 1,88E-04 - 2,70E-02 | 2           |
| Hematological System Development and Function  | 1,88E-04 - 2,99E-02 | 9           |

## Top Canonical Pathways

| Name                                                        | p-value  | Ratio         |
|-------------------------------------------------------------|----------|---------------|
| Altered T Cell and B Cell Signaling in Rheumatoid Arthritis | 2,26E-03 | 3/91 (0,033)  |
| Systemic Lupus Erythematosus Signaling                      | 4,63E-03 | 4/246 (0,016) |
| Glucocorticoid Receptor Signaling                           | 8,02E-03 | 4/280 (0,014) |
| Rapoport-Luebering Glycolytic Shunt                         | 1,21E-02 | 1/4 (0,25)    |
| TREM1 Signaling                                             | 1,34E-02 | 2/61 (0,033)  |

## Top Molecules

## Fold Change up-regulated

| Molecules       | Exp. Value | Exp. Chart |
|-----------------|------------|------------|
| IGF2BP3         | ↑7,895     |            |
| CHORDC1         | ↑6,259     |            |
| CPED1           | ↑4,485     |            |
| ARL17A          | ↑3,444     |            |
| RPL35           | ↑3,168     |            |
| UTY             | ↑3,034     |            |
| FOXD4L3/FOXD4L6 | ↑2,904     |            |
| HSPA1A/HSPA1B   | ↑2,800     |            |
| HNRNPK          | ↑2,670     |            |
| DYNLL1          | ↑2,644     |            |

## Fold Change down-regulated

| Molecules     | Exp. Value | Exp. Chart |
|---------------|------------|------------|
| IGK           | ↓4,682     |            |
| IFI44L        | ↓3,772     |            |
| ZNF417/ZNF587 | ↓3,608     |            |

|         |         |
|---------|---------|
| PPBP    | ↓-3,568 |
| HBB     | ↓-3,462 |
| SLC44A5 | ↓-2,845 |
| CDH2    | ↓-2,739 |
| IFIT3   | ↓-2,728 |
| SLFN5   | ↓-2,719 |
| RBMS2   | ↓-2,691 |

### Top Upstream Regulators

| Upstream Regulator               | p-value of overlap | Predicted Activation State |
|----------------------------------|--------------------|----------------------------|
| HNRNPU                           | 1,27E-05           |                            |
| RET                              | 1,48E-05           |                            |
| miR-3684 (miRNAs w/seed UAGACCU) | 2,95E-05           |                            |
| HSF1                             | 1,24E-04           |                            |
| RPA1                             | 1,41E-04           |                            |

## Top My Lists

| Name                                               | p-value  | Ratio         |
|----------------------------------------------------|----------|---------------|
| PreBI vs PreBII_miR target filter_cell cycle_ID2_c | 4,39E-04 | 3/51 (0,059)  |
| PreBI vs PreBIIL-miR target filter_cell cycle_adul | 4,47E-02 | 2/111 (0,018) |
| PreBI vs PreBII_miR and mRNA_network1_adults       | 9,27E-02 | 1/34 (0,029)  |
| PreBI vs PreBIIL_miR_and mRNA_adults               | 1,36E-01 | 1/63 (0,016)  |
| PreBI vs PreBIIL_miR_and mRNA_utvidet_adults       | 1,49E-01 | 1/60 (0,017)  |

## Top My Pathways

| Name                                  | p-value  | Ratio        |
|---------------------------------------|----------|--------------|
| PreBI vs PreBIIL_miRs and mRNA_voksne | 1,49E-01 | 1/60 (0,017) |

## Top Tox Lists

| Name                                                                       | p-value  | Ratio        |
|----------------------------------------------------------------------------|----------|--------------|
| Reversible Glomerulonephritis Biomarker Panel (Rat)                        | 3,02E-03 | 2/27 (0,074) |
| Acute Renal Failure Panel (Rat)                                            | 1,52E-02 | 2/62 (0,032) |
| FXR/RXR Activation                                                         | 2,8E-02  | 2/86 (0,023) |
| Increases Damage of Mitochondria                                           | 3,29E-02 | 1/11 (0,091) |
| Mechanism of Gene Regulation by Peroxisome Proliferators via PPAR $\alpha$ | 3,37E-02 | 2/95 (0,021) |

## Top Tox Functions

### Assays: Clinical Chemistry and Hematology

| Name                                     | p-value             | # Molecules |
|------------------------------------------|---------------------|-------------|
| Increased Levels of Albumin              | 3,03E-03 - 3,03E-03 | 1           |
| Decreased Levels of Albumin              | 1,21E-02 - 1,21E-02 | 1           |
| Increased Levels of ALT                  | 1,81E-02 - 1,81E-02 | 1           |
| Increased Levels of LDH                  | 3,87E-02 - 3,87E-02 | 1           |
| Increased Levels of Alkaline Phosphatase | 1,89E-01 - 1,89E-01 | 1           |

### Cardiotoxicity

| Name                 | p-value             | # Molecules |
|----------------------|---------------------|-------------|
| Cardiac Inflammation | 9,07E-03 - 1,12E-01 | 2           |
| Cardiac Fibrosis     | 2,10E-02 - 2,10E-02 | 1           |
| Cardiac Damage       | 1,17E-01 - 1,17E-01 | 1           |
| Cardiac Arrhythmia   | 2,51E-01 - 2,51E-01 | 1           |
| Cardiac Hypertrophy  | 3,13E-01 - 5,23E-01 | 2           |

### Hepatotoxicity

| Name                                 | p-value             | # Molecules |
|--------------------------------------|---------------------|-------------|
| Liver Damage                         | 6,18E-02 - 6,18E-02 | 1           |
| Hepatocellular Carcinoma             | 1,46E-01 - 1,76E-01 | 3           |
| Liver Hyperplasia/Hyperproliferation | 1,46E-01 - 1,76E-01 | 3           |
| Liver Cirrhosis                      | 2,49E-01 - 2,49E-01 | 1           |
| Liver Proliferation                  | 3,71E-01 - 3,71E-01 | 1           |

### Nephrotoxicity

| Name                      | p-value             | # Molecules |
|---------------------------|---------------------|-------------|
| Renal Necrosis/Cell Death | 6,75E-02 - 1,82E-01 | 3           |
| Nephrosis                 | 1,57E-01 - 1,57E-01 | 1           |
| Renal Proliferation       | 1,72E-01 - 1,72E-01 | 1           |
| Renal Damage              | 2,47E-01 - 2,47E-01 | 1           |
| Renal Tubule Injury       | 2,47E-01 - 2,47E-01 | 1           |



Analysis Name: Child PreBII L vs Adult PreBII L

Analysis Creation Date: 2013-06-09

Build version: 220217

Content version: 16542223 (Release Date: 2013-05-13)

## Analysis settings

[View](#)

Reference set: Ingenuity Knowledge Base (Genes Only)

Relationship to include: Direct and Indirect

Includes Endogenous Chemicals

Optional Analyses: My Pathways My List

Filter Summary:

Consider only molecules and/or relationships where

(species = Rat OR Human OR Mouse) AND

(confidence = Experimentally Observed OR High (predicted))

Cutoff:

## Top Networks

| ID | Associated Network Functions                                                   | Score |
|----|--------------------------------------------------------------------------------|-------|
| 1  | Cancer, Hematological System Development and Function, Humoral Immune Response | 34    |
| 2  | Carbohydrate Metabolism, Lipid Metabolism, Post-Translational Modification     | 29    |

|   |                                                                                    |    |
|---|------------------------------------------------------------------------------------|----|
| 3 | Endocrine System Disorders, Reproductive System Disease, Cancer                    | 27 |
| 4 | Developmental Disorder, Ophthalmic Disease, Protein Synthesis                      | 20 |
| 5 | Lymphoid Tissue Structure and Development, Tissue Morphology, Cellular Development | 17 |

## Top Bio Functions

### Diseases and Disorders

| Name                        | p-value             | # Molecules |
|-----------------------------|---------------------|-------------|
| Cancer                      | 5,27E-04 - 4,09E-02 | 19          |
| Reproductive System Disease | 5,27E-04 - 2,31E-02 | 9           |
| Neurological Disease        | 6,14E-04 - 3,73E-02 | 9           |
| Inflammatory Response       | 3,40E-03 - 4,09E-02 | 4           |
| Cardiovascular Disease      | 3,79E-03 - 3,36E-02 | 3           |

### Molecular and Cellular Functions

| Name                                   | p-value             | # Molecules |
|----------------------------------------|---------------------|-------------|
| Cell Cycle                             | 1,86E-03 - 4,86E-02 | 6           |
| Cell Death and Survival                | 1,86E-03 - 4,82E-02 | 11          |
| Protein Synthesis                      | 2,32E-03 - 3,36E-02 | 10          |
| Cell-To-Cell Signaling and Interaction | 3,40E-03 - 4,46E-02 | 7           |
| Carbohydrate Metabolism                | 3,79E-03 - 2,62E-02 | 1           |

### Physiological System Development and Function

| Name                                          | p-value             | # Molecules |
|-----------------------------------------------|---------------------|-------------|
| Hematological System Development and Function | 1,86E-03 - 4,82E-02 | 7           |
| Humoral Immune Response                       | 1,86E-03 - 3,73E-02 | 5           |
| Tissue Morphology                             | 1,86E-03 - 4,82E-02 | 6           |
| Lymphoid Tissue Structure and Development     | 3,23E-03 - 3,73E-02 | 6           |
| Embryonic Development                         | 3,74E-03 - 4,46E-02 | 7           |

## Top Canonical Pathways

| Name                                                        | p-value  | Ratio         |
|-------------------------------------------------------------|----------|---------------|
| EIF2 Signaling                                              | 5,12E-03 | 4/192 (0,021) |
| S-methyl-5-thio- $\alpha$ -D-ribose 1-phosphate Degradation | 7,57E-03 | 1/2 (0,5)     |
| Serine Biosynthesis                                         | 1,51E-02 | 1/4 (0,25)    |
| Regulation of eIF4 and p70S6K Signaling                     | 1,83E-02 | 3/164 (0,018) |
| Superpathway of Serine and Glycine Biosynthesis I           | 2,25E-02 | 1/6 (0,167)   |

## Top Molecules

## Fold Change up-regulated

| Molecules                  | Exp. Value | Exp. Chart |
|----------------------------|------------|------------|
| IGF2BP3                    | ↑7,349     |            |
| RABL2B                     | ↑3,473     |            |
| HNRNPK                     | ↑2,918     |            |
| FOXD4L3/FOXD4L6            | ↑2,793     |            |
| PCDH11X/PCDH11Y            | ↑2,771     |            |
| AMICA1                     | ↑2,746     |            |
| LAMP5                      | ↑2,719     |            |
| ZFY                        | ↑2,695     |            |
| ENPP2                      | ↑2,521     |            |
| LRRC37A3 (includes others) | ↑2,388     |            |

## Fold Change down-regulated

| Molecules | Exp. Value | Exp. Chart |
|-----------|------------|------------|
| ID2       | ↓9,357     |            |
| HBB       | ↓4,052     |            |
| ACBD7     | ↓3,262     |            |

|        |         |
|--------|---------|
| APIP   | ↓-2,993 |
| RBMS2  | ↓-2,853 |
| EIF1AX | ↓-2,834 |
| PIGH   | ↓-2,668 |
| SMU1   | ↓-2,659 |
| RGS2   | ↓-2,644 |
| GTSF1  | ↓-2,503 |

### Top Upstream Regulators

| Upstream Regulator                           | p-value of overlap | Predicted Activation State |
|----------------------------------------------|--------------------|----------------------------|
| miR-881-3p (and other miRNAs w/seed ACUGUGU) | 1,40E-04           |                            |
| TET2                                         | 4,39E-04           |                            |
| ATF4                                         | 6,98E-04           |                            |
| MTA2                                         | 1,03E-03           |                            |
| BRCA1                                        | 1,51E-03           |                            |

## Top My Lists

| Name                                               | p-value  | Ratio         |
|----------------------------------------------------|----------|---------------|
| PreBI vs PreBIII-miR target filter_cell cycle_adul | 6,3E-05  | 5/111 (0,045) |
| PreBI vs PreBII_miR and mRNA_network1_adults       | 6,52E-03 | 2/34 (0,059)  |
| PreBI vs PreBIII_miR_and mRNA_utvidet_adults       | 1,72E-02 | 2/60 (0,033)  |
| PreBI vs PreBII L barn_miR_utvidet mRNA_Core TFs   | 4,09E-02 | 1/16 (0,062)  |
| PreBI vs PreBII_miR target filter_cell cycle_ID2_c | 1,7E-01  | 1/51 (0,02)   |

## Top My Pathways

| Name                                       | p-value  | Ratio        |
|--------------------------------------------|----------|--------------|
| PreBI vs PreBIII_miRs and mRNA_voksne      | 1,72E-02 | 2/60 (0,033) |
| PreBI vs PreBII L_miR og mRNA_core TF_barn | 7,67E-02 | 1/26 (0,038) |

## Top Tox Lists

| Name                                                                         | p-value  | Ratio         |
|------------------------------------------------------------------------------|----------|---------------|
| Reversible Glomerulonephritis Biomarker Panel (Rat)                          | 9,75E-02 | 1/27 (0,037)  |
| Pro-Apoptosis                                                                | 1,48E-01 | 1/42 (0,024)  |
| Increases Transmembrane Potential of Mitochondria and Mitochondrial Membrane | 1,73E-01 | 1/50 (0,02)   |
| Cardiac Necrosis/Cell Death                                                  | 2,27E-01 | 2/237 (0,008) |
| Hypoxia-Inducible Factor Signaling                                           | 2,34E-01 | 1/70 (0,014)  |

## Top Tox Functions

### Assays: Clinical Chemistry and Hematology

| Name                                | p-value             | # Molecules |
|-------------------------------------|---------------------|-------------|
| Increased Levels of Red Blood Cells | 3,06E-01 - 3,06E-01 | 1           |
| Increased Levels of Hematocrit      | 3,09E-01 - 3,09E-01 | 1           |

### Cardiotoxicity

| Name                        | p-value             | # Molecules |
|-----------------------------|---------------------|-------------|
| Cardiac Hypertrophy         | 1,15E-01 - 1,15E-01 | 1           |
| Cardiac Necrosis/Cell Death | 1,58E-01 - 1,58E-01 | 2           |
| Cardiac Arrythmia           | 3,04E-01 - 3,04E-01 | 1           |
| Cardiac Arteriopathy        | 3,08E-01 - 3,08E-01 | 2           |

### Hepatotoxicity

| Name                                 | p-value             | # Molecules |
|--------------------------------------|---------------------|-------------|
| Liver Necrosis/Cell Death            | 1,08E-01 - 1,08E-01 | 1           |
| Liver Inflammation/Hepatitis         | 1,61E-01 - 1,61E-01 | 1           |
| Liver Hyperplasia/Hyperproliferation | 2,48E-01 - 5,45E-01 | 4           |
| Liver Cirrhosis                      | 3,01E-01 - 3,01E-01 | 1           |
| Hepatocellular Carcinoma             | 5,45E-01 - 5,45E-01 | 2           |

### Nephrotoxicity

| Name                      | p-value             | # Molecules |
|---------------------------|---------------------|-------------|
| Renal Proliferation       | 1,13E-02 - 1,13E-02 | 1           |
| Renal Necrosis/Cell Death | 3,73E-02 - 6,25E-01 | 1           |
| Glomerular Injury         | 7,67E-02 - 7,67E-02 | 1           |
| Renal Hydronephrosis      | 2,87E-01 - 2,87E-01 | 1           |

Kidney Failure

3,77E-01 - 3,77E-01 1



Analysis Name: Child PreBII s vs Adult PreBII s

Analysis Creation Date: 2013-06-09

Build version: 220217

Content version: 16542223 (Release Date: 2013-05-13)

## Analysis settings

[View](#)

Reference set: Ingenuity Knowledge Base (Genes Only)

Relationship to include: Direct and Indirect

Includes Endogenous Chemicals

Optional Analyses: My Pathways My List

Filter Summary:

Consider only molecules and/or relationships where

(species = Rat OR Human OR Mouse) AND

(confidence = Experimentally Observed OR High (predicted))

Cutoff:

## Top Networks

| ID | Associated Network Functions                                                          | Score |
|----|---------------------------------------------------------------------------------------|-------|
| 1  | Cellular Movement, Connective Tissue Development and Function, Cardiovascular Disease | 36    |
| 2  | Cell Signaling, Nucleic Acid Metabolism, Small Molecule Biochemistry                  | 15    |

3 Hereditary Disorder, Neurological Disease, Psychological Disorders

2

## Top Bio Functions

### Diseases and Disorders

| Name                        | p-value             | # Molecules |
|-----------------------------|---------------------|-------------|
| Neurological Disease        | 2,57E-05 - 9,92E-04 | 5           |
| Cancer                      | 9,92E-04 - 4,47E-02 | 7           |
| Cardiovascular Disease      | 9,92E-04 - 3,13E-02 | 3           |
| Connective Tissue Disorders | 9,92E-04 - 1,77E-02 | 2           |
| Developmental Disorder      | 9,92E-04 - 3,13E-02 | 4           |

### Molecular and Cellular Functions

| Name                                  | p-value             | # Molecules |
|---------------------------------------|---------------------|-------------|
| RNA Post-Transcriptional Modification | 2,97E-04 - 3,51E-02 | 3           |
| Cellular Development                  | 5,72E-04 - 4,85E-02 | 6           |
| Antigen Presentation                  | 9,92E-04 - 9,92E-04 | 1           |
| Cell Cycle                            | 9,92E-04 - 7,91E-03 | 1           |
| Cell Death and Survival               | 9,92E-04 - 4,76E-02 | 4           |

### Physiological System Development and Function

| Name                                           | p-value             | # Molecules |
|------------------------------------------------|---------------------|-------------|
| Cardiovascular System Development and Function | 9,92E-04 - 4,85E-02 | 4           |
| Cell-mediated Immune Response                  | 9,92E-04 - 4,66E-02 | 2           |
| Digestive System Development and Function      | 9,92E-04 - 1,77E-02 | 1           |
| Embryonic Development                          | 9,92E-04 - 4,37E-02 | 5           |
| Hematological System Development and Function  | 9,92E-04 - 4,85E-02 | 4           |

## Top Canonical Pathways

| Name                                   | p-value  | Ratio        |
|----------------------------------------|----------|--------------|
| Interferon Signaling                   | 3,32E-02 | 1/34 (0,029) |
| Neurotrophin/TRK Signaling             | 6,54E-02 | 1/71 (0,014) |
| Ephrin B Signaling                     | 7,09E-02 | 1/80 (0,012) |
| Mouse Embryonic Stem Cell Pluripotency | 9,02E-02 | 1/99 (0,01)  |
| SAPK/JNK Signaling                     | 9,02E-02 | 1/102 (0,01) |

## Top Molecules

## Fold Change up-regulated

| Molecules   | Exp. Value | Exp. Chart |
|-------------|------------|------------|
| IGF2BP3     | ↑4,676     |            |
| FAM127A     | ↑3,450     |            |
| CDR1        | ↑3,324     |            |
| CBWD3/CBWD6 | ↑3,193     |            |
| C21orf62    | ↑3,009     |            |
| LAMP5       | ↑2,847     |            |
| AMICA1      | ↑2,519     |            |
| HNRNPK      | ↑2,351     |            |
| TMSB4Y      | ↑2,346     |            |
| ZFY         | ↑2,320     |            |

## Fold Change down-regulated

| Molecules | Exp. Value | Exp. Chart |
|-----------|------------|------------|
| ID2       | ↓-2,879    |            |
| IFIT3     | ↓-2,606    |            |
| GIMAP4    | ↓-2,588    |            |

|              |         |
|--------------|---------|
| LOC100134868 | ↓-2,512 |
| HBB          | ↓-2,504 |
| RGS2         | ↓-2,252 |
| MROH9        | ↓-2,148 |
| CD96         | ↓-2,066 |
| SPRY1        | ↓-2,023 |
| C11orf74     | ↓-2,017 |

### Top Upstream Regulators

| Upstream Regulator | p-value of overlap | Predicted Activation State |
|--------------------|--------------------|----------------------------|
| MTA2               | 8,99E-05           |                            |
| CHD4               | 1,38E-04           |                            |
| COMMD3-BMI1        | 2,41E-04           |                            |
| SUPT16H            | 2,65E-04           |                            |
| SSRP1              | 4,96E-04           |                            |

### Top My Lists

| Name                                                               | p-value  | Ratio         |
|--------------------------------------------------------------------|----------|---------------|
| <a href="#">PreBI vs PreBII L barn_miR_utvidet mRNA_Core TFs</a>   | 1,09E-02 | 1/16 (0,062)  |
| <a href="#">PreBI vs PreBII_miR and mRNA_network1_adults</a>       | 3,13E-02 | 1/34 (0,029)  |
| <a href="#">PreBI vs PreBII_miR target filter_cell cycle_ID2_c</a> | 4,75E-02 | 1/51 (0,02)   |
| <a href="#">PreBI vs PreBIII_miR_and mRNA_utvidet_adults</a>       | 5,13E-02 | 1/60 (0,017)  |
| <a href="#">PreBI vs PreBIII-miR target filter_cell cycle_adul</a> | 1,05E-01 | 1/111 (0,009) |

### Top My Pathways

| Name                                                       | p-value  | Ratio        |
|------------------------------------------------------------|----------|--------------|
| <a href="#">PreBI vs PreBII L_miR og mRNA_core TF_barn</a> | 2,06E-02 | 1/26 (0,038) |
| <a href="#">PreBI vs PreBIII_miRs and mRNA_voksne</a>      | 5,13E-02 | 1/60 (0,017) |

### Top Tox Lists

| Name                                                                | p-value  | Ratio         |
|---------------------------------------------------------------------|----------|---------------|
| <a href="#">Reversible Glomerulonephritis Biomarker Panel (Rat)</a> | 2,65E-02 | 1/27 (0,037)  |
| <a href="#">Cardiac Hypertrophy</a>                                 | 2,92E-01 | 1/344 (0,003) |

**Top Tox Functions****Assays: Clinical Chemistry and Hematology**

| Name                                                | p-value             | # Molecules |
|-----------------------------------------------------|---------------------|-------------|
| <a href="#">Increased Levels of Red Blood Cells</a> | 9,11E-02 - 9,11E-02 | 1           |
| <a href="#">Increased Levels of Hematocrit</a>      | 9,20E-02 - 9,20E-02 | 1           |

**Cardiotoxicity**

| Name                                | p-value             | # Molecules |
|-------------------------------------|---------------------|-------------|
| <a href="#">Cardiac Hypertrophy</a> | 3,13E-02 - 3,13E-02 | 1           |

**Hepatotoxicity**

| Name                            | p-value             | # Molecules |
|---------------------------------|---------------------|-------------|
| <a href="#">Liver Cirrhosis</a> | 8,93E-02 - 8,93E-02 | 1           |

**Nephrotoxicity**

| Name                                 | p-value             | # Molecules |
|--------------------------------------|---------------------|-------------|
| <a href="#">Renal Hydronephrosis</a> | 8,47E-02 - 8,47E-02 | 1           |

Analysis Name: Child Immature B vs Adult Immature B

Analysis Creation Date: 2013-06-09

Build version: 220217

Content version: 16542223 (Release Date: 2013-05-13)

## Analysis settings

[View](#)

Reference set: Ingenuity Knowledge Base (Genes Only)

Relationship to include: Direct and Indirect

Includes Endogenous Chemicals

Optional Analyses: My Pathways My List

Filter Summary:

Consider only molecules and/or relationships where

(species = Rat OR Human OR Mouse) AND

(confidence = Experimentally Observed OR High (predicted))

Cutoff:

## Top Networks

| ID | Associated Network Functions                                                               | Score |
|----|--------------------------------------------------------------------------------------------|-------|
| 1  | Cell Cycle, Cellular Assembly and Organization, DNA Replication, Recombination, and Repair | 62    |
| 2  | Nucleic Acid Metabolism, Small Molecule Biochemistry, Cancer                               | 47    |



|   |                                                                                                           |    |
|---|-----------------------------------------------------------------------------------------------------------|----|
| 3 | Cell Death and Survival, Embryonic Development, Protein Degradation                                       | 30 |
| 4 | Embryonic Development, Organ Development, Organismal Development                                          | 27 |
| 5 | Cellular Function and Maintenance, Hematological System Development and Function, Humoral Immune Response | 25 |

## Top Bio Functions

### Diseases and Disorders

| Name                            | p-value             | # Molecules |
|---------------------------------|---------------------|-------------|
| Cancer                          | 3,62E-09 - 1,35E-02 | 75          |
| Reproductive System Disease     | 3,62E-09 - 8,93E-03 | 30          |
| Gastrointestinal Disease        | 1,97E-08 - 1,10E-02 | 41          |
| Hepatic System Disease          | 2,56E-06 - 1,10E-02 | 17          |
| Skeletal and Muscular Disorders | 6,69E-06 - 6,77E-03 | 13          |

### Molecular and Cellular Functions

| Name                                       | p-value             | # Molecules |
|--------------------------------------------|---------------------|-------------|
| Cell Cycle                                 | 5,65E-17 - 1,35E-02 | 47          |
| Cellular Assembly and Organization         | 5,65E-17 - 1,35E-02 | 32          |
| DNA Replication, Recombination, and Repair | 5,65E-17 - 1,35E-02 | 44          |
| Cell Death and Survival                    | 1,59E-05 - 1,35E-02 | 33          |
| Cellular Growth and Proliferation          | 3,05E-05 - 1,35E-02 | 50          |

### Physiological System Development and Function

| Name                                          | p-value             | # Molecules |
|-----------------------------------------------|---------------------|-------------|
| Embryonic Development                         | 1,36E-04 - 1,35E-02 | 27          |
| Nervous System Development and Function       | 1,36E-04 - 8,45E-03 | 10          |
| Hematological System Development and Function | 1,92E-04 - 1,35E-02 | 20          |
| Humoral Immune Response                       | 1,92E-04 - 1,33E-02 | 8           |
| Tissue Morphology                             | 1,92E-04 - 1,35E-02 | 17          |

### Top Canonical Pathways

| Name                                                  | p-value  | Ratio        |
|-------------------------------------------------------|----------|--------------|
| Mitotic Roles of Polo-Like Kinase                     | 6,01E-06 | 6/70 (0,086) |
| Cell Cycle: G2/M DNA Damage Checkpoint Regulation     | 1,14E-05 | 5/49 (0,102) |
| Role of CHK Proteins in Cell Cycle Checkpoint Control | 5,2E-04  | 4/57 (0,07)  |
| Role of BRCA1 in DNA Damage Response                  | 7,25E-04 | 4/63 (0,063) |
| ATM Signaling                                         | 7,25E-04 | 4/62 (0,065) |

### Top Molecules

#### Fold Change up-regulated

| Molecules               | Exp. Value | Exp. Chart |
|-------------------------|------------|------------|
| IGF2BP3                 | ↑7,947     |            |
| HGF                     | ↑3,914     |            |
| CDR1                    | ↑3,860     |            |
| FOXD4L3/FOXD4L6         | ↑3,540     |            |
| GPR174                  | ↑3,424     |            |
| TAS2R4                  | ↑3,094     |            |
| PCDH11X/PCDH11Y         | ↑2,966     |            |
| PLEK                    | ↑2,929     |            |
| GRAPL                   | ↑2,893     |            |
| LCE2C (includes others) | ↑2,816     |            |

#### Fold Change down-regulated

| Molecules | Exp. Value | Exp. Chart |
|-----------|------------|------------|
| HBB       | ↓6,710     |            |
| HIST1H2BB | ↓5,242     |            |
| RGS2      | ↓3,762     |            |

|                             |         |
|-----------------------------|---------|
| SPC25                       | ↓-3,617 |
| MROH9                       | ↓-3,525 |
| HIST2H2BE (includes others) | ↓-3,349 |
| MND1                        | ↓-3,202 |
| MTFR2                       | ↓-3,189 |
| DNTT                        | ↓-3,131 |
| MKI67                       | ↓-3,108 |

### Top Upstream Regulators

| Upstream Regulator | p-value of overlap | Predicted Activation State |
|--------------------|--------------------|----------------------------|
| CDKN1A             | 6,47E-26           | Activated                  |
| E2F4               | 7,32E-26           |                            |
| CCND1              | 1,82E-21           | Inhibited                  |
| TP53               | 1,13E-17           | Activated                  |
| CDK4               | 2,22E-17           |                            |

### Top My Lists

| Name                                               | p-value  | Ratio             |
|----------------------------------------------------|----------|-------------------|
| PreBI vs PreBIIL-miR target filter_cell cycle_adul | 1,16E-11 | 12/111<br>(0,108) |
| PreBI vs PreBII_miR and mRNA_network1_adults       | 1,97E-02 | 2/34 (0,059)      |
| PreBI vs PreBII_miR target filter_cell cycle_ID2_c | 4,34E-02 | 2/51 (0,039)      |
| PreBI vs PreBIIL_miR_and mRNA_utvidet_adults       | 5E-02    | 2/60 (0,033)      |
| PreBI vs PreBII L barn_miR_utvidet mRNA_Core TFs   | 7,2E-02  | 1/16 (0,062)      |

### Top My Pathways

| Name                                       | p-value  | Ratio        |
|--------------------------------------------|----------|--------------|
| PreBI vs PreBIIL_miRs and mRNA_voksne      | 5E-02    | 2/60 (0,033) |
| PreBI vs PreBII L_miR og mRNA_core TF_barn | 1,33E-01 | 1/26 (0,038) |

### Top Tox Lists

| Name                                                                         | p-value  | Ratio         |
|------------------------------------------------------------------------------|----------|---------------|
| Cell Cycle: G2/M DNA Damage Checkpoint Regulation                            | 1,77E-05 | 5/48 (0,104)  |
| Increases Liver Hyperplasia/Hyperproliferation                               | 6,8E-04  | 4/59 (0,068)  |
| Reversible Glomerulonephritis Biomarker Panel (Rat)                          | 1,43E-02 | 2/27 (0,074)  |
| Aryl Hydrocarbon Receptor Signaling                                          | 2,34E-02 | 4/160 (0,025) |
| Increases Transmembrane Potential of Mitochondria and Mitochondrial Membrane | 4,5E-02  | 2/50 (0,04)   |

## Top Tox Functions

### Assays: Clinical Chemistry and Hematology

| Name                                | p-value             | # Molecules |
|-------------------------------------|---------------------|-------------|
| Increased Levels of Red Blood Cells | 2,74E-02 - 2,74E-02 | 3           |
| Increased Levels of Hematocrit      | 1,40E-01 - 1,40E-01 | 2           |

### Cardiotoxicity

| Name                                   | p-value             | # Molecules |
|----------------------------------------|---------------------|-------------|
| Cardiac Regeneration                   | 1,35E-02 - 1,35E-02 | 1           |
| Cardiac Hyperplasia/Hyperproliferation | 2,02E-02 - 2,02E-02 | 1           |
| Cardiac Output                         | 2,68E-02 - 2,68E-02 | 1           |
| Cardiac Inflammation                   | 1,03E-01 - 1,03E-01 | 1           |
| Congenital Heart Anomaly               | 1,21E-01 - 2,74E-01 | 1           |

### Hepatotoxicity

| Name                                 | p-value             | # Molecules |
|--------------------------------------|---------------------|-------------|
| Liver Hyperplasia/Hyperproliferation | 2,56E-06 - 3,26E-01 | 17          |
| Hepatocellular Carcinoma             | 2,11E-05 - 3,26E-01 | 13          |
| Liver Necrosis/Cell Death            | 1,07E-03 - 3,34E-02 | 3           |
| Liver Cholestasis                    | 2,02E-02 - 2,02E-02 | 1           |
| Liver Failure                        | 2,68E-02 - 9,07E-02 | 2           |

### Nephrotoxicity

| Name               | p-value             | # Molecules |
|--------------------|---------------------|-------------|
| Renal Inflammation | 1,35E-02 - 4,40E-01 | 3           |
| Renal Nephritis    | 1,35E-02 - 4,40E-01 | 3           |
| Renal Regeneration | 1,35E-02 - 1,35E-02 | 1           |

Renal Necrosis/Cell Death  
Renal Damage

6,57E-02 - 5,19E-01     3  
8,35E-02 - 9,69E-02     2
