# Supplementary material for: Transcriptional Profiling of mRNAs and microRNAs in Human Bone Marrow Precursor B Cells Identifies Subset- and Age-Specific Variations
Source: PubMed Central journal article supplement (PMC3728296; doi:10.1371/journal.pone.0070721), 2013-07-30
Supplement: pone.0070721.s017.pdf [file pone.0070721.s017.pdf]

Analysis Name: Child ProB vs Adult ProB\_miR

Analysis Creation Date: 2013-06-09

Build version: 220217

Content version: 16542223 (Release Date: 2013-05-13)

## Analysis settings

[View](#)

Reference set: Ingenuity Knowledge Base (Genes Only)

Relationship to include: Direct and Indirect

Includes Endogenous Chemicals

Optional Analyses: My Pathways My List

Filter Summary:

Consider only molecules and/or relationships where

(species = Rat OR Human OR Mouse) AND

(confidence = Experimentally Observed OR High (predicted))

Cutoff:

## Top Networks

| ID | Associated Network Functions                                                      | Score |
|----|-----------------------------------------------------------------------------------|-------|
| 1  | Hereditary Disorder, Skeletal and Muscular Disorders, Reproductive System Disease | 33    |
| 2  | Inflammatory Disease, Inflammatory Response, Renal Inflammation                   | 30    |

|   |                                                                                  |    |
|---|----------------------------------------------------------------------------------|----|
| 3 | Cancer, Gastrointestinal Disease, Cardiovascular System Development and Function | 17 |
| 4 | Tissue Morphology, Cancer, Cell Morphology                                       | 2  |
| 5 | Developmental Disorder, Hereditary Disorder, Skeletal and Muscular Disorders     | 2  |

## Top Bio Functions

### Diseases and Disorders

| Name                         | p-value             | # Molecules |
|------------------------------|---------------------|-------------|
| Reproductive System Disease  | 7,01E-23 - 3,32E-02 | 21          |
| Inflammatory Disease         | 3,05E-21 - 5,82E-03 | 15          |
| Inflammatory Response        | 3,05E-21 - 1,02E-02 | 15          |
| Renal and Urological Disease | 3,05E-21 - 2,56E-02 | 17          |
| Cancer                       | 4,74E-14 - 4,98E-02 | 23          |

### Molecular and Cellular Functions

| Name                              | p-value             | # Molecules |
|-----------------------------------|---------------------|-------------|
| Cell Cycle                        | 3,05E-05 - 3,02E-02 | 6           |
| Cellular Development              | 1,44E-04 - 4,98E-02 | 11          |
| Cell Death and Survival           | 2,04E-03 - 4,01E-02 | 9           |
| Cellular Compromise               | 2,04E-03 - 6,11E-03 | 3           |
| Cellular Growth and Proliferation | 2,86E-03 - 4,90E-02 | 10          |

### Physiological System Development and Function

| Name                                       | p-value             | # Molecules |
|--------------------------------------------|---------------------|-------------|
| Connective Tissue Development and Function | 3,05E-05 - 3,05E-05 | 3           |
| Organismal Development                     | 1,44E-04 - 4,20E-02 | 3           |
| Digestive System Development and Function  | 1,70E-03 - 1,70E-03 | 2           |
| Hepatic System Development and Function    | 1,70E-03 - 1,70E-03 | 2           |
| Organ Development                          | 1,70E-03 - 1,02E-02 | 3           |

## Top Canonical Pathways

| Name | p-value | Ratio |
|------|---------|-------|
|------|---------|-------|

## Top Molecules

### Fold Change up-regulated

| Molecules                                    | Exp. Value | Exp. Chart |
|----------------------------------------------|------------|------------|
| let-7a-5p (and other miRNAs w/seed GAGGUAG)  | ↑81,855    |            |
| miR-657 (miRNAs w/seed GCAGGUU)              | ↑58,384    |            |
| miR-579 (and other miRNAs w/seed UCAUUUG)    | ↑56,103    |            |
| miR-362-5p (and other miRNAs w/seed AUCCUUG) | ↑54,948    |            |
| miR-454-5p (miRNAs w/seed CCCUAUC)           | ↑49,095    |            |
| miR-16-5p (and other miRNAs w/seed AGCAGCA)* | ↑29,600    |            |
| miR-660-5p (miRNAs w/seed ACCCAUU)           | ↑29,344    |            |
| miR-16-1-3p (miRNAs w/seed CAGUAUU)          | ↑23,670    |            |
| miR-941 (miRNAs w/seed ACCCGGC)              | ↑23,223    |            |
| miR-524-3p (and other miRNAs w/seed AAGGCGC) | ↑20,008    |            |

### Fold Change down-regulated

| Molecules                                  | Exp. Value | Exp. Chart |
|--------------------------------------------|------------|------------|
| miR-615-3p (miRNAs w/seed CCGAGCC)         | ↓52,985    |            |
| miR-451a (and other miRNAs w/seed AACCGUU) | ↓10,144    |            |

## Top Upstream Regulators

## Top My Lists

| Name                                                               | p-value  | Ratio        |
|--------------------------------------------------------------------|----------|--------------|
| <a href="#">PreBI vs PreBIIL_miR_adults</a>                        | 7,79E-11 | 5/18 (0,278) |
| <a href="#">PreBI vs PreBIIL_miRs only_adults</a>                  | 1,43E-10 | 6/51 (0,118) |
| <a href="#">PreBI vs PreBII_miR target filter_cell cycle_ID2_c</a> | 6,05E-10 | 6/51 (0,118) |
| <a href="#">PreBI vs PreBIIL_miR_and mRNA_adults</a>               | 4,23E-08 | 5/63 (0,079) |
| <a href="#">PreBI vs PreBIIL_miR_and mRNA_utvidet_adults</a>       | 7,04E-08 | 5/60 (0,083) |

## Top My Pathways

| Name                                                       | p-value  | Ratio        |
|------------------------------------------------------------|----------|--------------|
| <a href="#">PreBI vs PreBIIL_miRs and mRNA_voksne</a>      | 7,04E-08 | 5/60 (0,083) |
| <a href="#">PreBI vs PreBII L_miR og mRNA_core TF_barn</a> | 1,01E-05 | 3/26 (0,115) |
| <a href="#">mir-126 PreBI/PreBII large children</a>        | 2,62E-02 | 1/15 (0,067) |

## Top Tox Lists

| Name                                                                                         | p-value  | Ratio         |
|----------------------------------------------------------------------------------------------|----------|---------------|
| <a href="#">Renal Ischemia-Reperfusion Injury MicroRNA Biomarker Panel (Mouse)</a>           | 1,62E-02 | 1/8 (0,125)   |
| <a href="#">Decreases Transmembrane Potential of Mitochondria and Mitochondrial Membrane</a> | 2,12E-01 | 1/116 (0,009) |

## Top Tox Functions

### Cardiotoxicity

| Name                        | p-value             | # Molecules |
|-----------------------------|---------------------|-------------|
| Congenital Heart Anomaly    | 2,20E-04 - 2,20E-04 | 2           |
| Cardiac Fibrosis            | 1,65E-03 - 1,65E-03 | 3           |
| Cardiac Infarction          | 2,02E-02 - 2,02E-02 | 1           |
| Cardiac Dilation            | 4,98E-02 - 4,98E-02 | 1           |
| Cardiac Necrosis/Cell Death | 5,67E-02 - 3,19E-01 | 2           |

### Hepatotoxicity

| Name                                 | p-value             | # Molecules |
|--------------------------------------|---------------------|-------------|
| Liver Hyperplasia/Hyperproliferation | 5,80E-07 - 4,28E-05 | 10          |
| Hepatocellular Carcinoma             | 4,28E-05 - 4,28E-05 | 7           |
| Liver Inflammation/Hepatitis         | 1,70E-03 - 1,70E-03 | 2           |
| Liver Cirrhosis                      | 3,09E-02 - 3,09E-02 | 2           |
| Liver Steatosis                      | 8,98E-02 - 8,98E-02 | 1           |

### Nephrotoxicity

| Name               | p-value             | # Molecules |
|--------------------|---------------------|-------------|
| Renal Inflammation | 3,05E-21 - 3,05E-21 | 13          |
| Renal Nephritis    | 3,05E-21 - 3,05E-21 | 13          |

Analysis Name: Child PreBI vs Adult PreBI\_miR

Analysis Creation Date: 2013-06-09

Build version: 220217

Content version: 16542223 (Release Date: 2013-05-13)

## Analysis settings

[View](#)

Reference set: Ingenuity Knowledge Base (Genes + Endogenous Chemicals)

Relationship to include: Direct and Indirect

Includes Endogenous Chemicals

Optional Analyses: My Pathways My List

Filter Summary:

Consider only molecules and/or relationships where

(species = Rat OR Human OR Mouse) AND

(confidence = Experimentally Observed OR High (predicted))

Cutoff:

## Top Networks

| ID | Associated Network Functions                                                 | Score |
|----|------------------------------------------------------------------------------|-------|
| 1  | Developmental Disorder, Hereditary Disorder, Skeletal and Muscular Disorders | 29    |
| 2  | Reproductive System Disease, Cancer, Gastrointestinal Disease                | 29    |

|   |                                                                                                  |   |
|---|--------------------------------------------------------------------------------------------------|---|
| 3 | Reproductive System Disease                                                                      | 3 |
| 4 | Cellular Development, Cellular Growth and Proliferation, Nervous System Development and Function | 3 |
| 5 |                                                                                                  | 3 |



## Top Bio Functions

### Diseases and Disorders

| Name                            | p-value             | # Molecules |
|---------------------------------|---------------------|-------------|
| Hereditary Disorder             | 6,76E-10 - 2,56E-03 | 6           |
| Skeletal and Muscular Disorders | 6,76E-10 - 2,55E-02 | 6           |
| Developmental Disorder          | 1,99E-09 - 2,79E-02 | 6           |
| Cancer                          | 6,43E-08 - 4,77E-02 | 16          |
| Gastrointestinal Disease        | 6,43E-08 - 4,77E-02 | 14          |

### Molecular and Cellular Functions

| Name                               | p-value             | # Molecules |
|------------------------------------|---------------------|-------------|
| Cell Cycle                         | 1,28E-03 - 3,39E-02 | 2           |
| Cell Death and Survival            | 1,28E-03 - 3,78E-02 | 3           |
| Cellular Assembly and Organization | 7,68E-03 - 2,66E-02 | 1           |
| Cellular Function and Maintenance  | 7,68E-03 - 2,66E-02 | 1           |
| Cellular Movement                  | 1,02E-02 - 4,89E-02 | 3           |

### Physiological System Development and Function

| Name                                                  | p-value             | # Molecules |
|-------------------------------------------------------|---------------------|-------------|
| Embryonic Development                                 | 2,49E-03 - 1,53E-02 | 2           |
| Organismal Development                                | 2,49E-03 - 1,53E-02 | 2           |
| Reproductive System Development and Function          | 2,49E-03 - 1,53E-02 | 2           |
| Skeletal and Muscular System Development and Function | 7,68E-03 - 2,66E-02 | 1           |
| Tissue Morphology                                     | 7,68E-03 - 7,68E-03 | 1           |

## Top Canonical Pathways

| Name                                   | p-value | Ratio         |
|----------------------------------------|---------|---------------|
| Systemic Lupus Erythematosus Signaling | 2,5E-01 | 1/246 (0,004) |

## Top Molecules

## Fold Change up-regulated

| Molecules                                    | Exp. Value | Exp. Chart |
|----------------------------------------------|------------|------------|
| miR-589-3p (miRNAs w/seed CAGAACA)           | ↑149,517   |            |
| mir-149                                      | ↑47,258    |            |
| miR-339-5p (and other miRNAs w/seed CCCUGUC) | ↑19,916    |            |
| RNU6-2*                                      | ↑7,652     |            |

## Fold Change down-regulated

| Molecules                                     | Exp. Value | Exp. Chart |
|-----------------------------------------------|------------|------------|
| mir-96                                        | ↓387,352   |            |
| miR-133a-3p (and other miRNAs w/seed UUGGUCC) | ↓111,045   |            |
| miR-200a-5p (and other miRNAs w/seed AUCUUAC) | ↓71,136    |            |
| miR-628-3p (miRNAs w/seed CUAGUAA)            | ↓55,012    |            |
| mir-638                                       | ↓47,395    |            |
| mir-657                                       | ↓45,307    |            |
| miR-518a-3p (and other miRNAs w/seed AAAGCGC) | ↓44,554    |            |
| miR-519a-3p (and other miRNAs w/seed AAGUGCA) | ↓32,881    |            |
| mir-566                                       | ↓29,293    |            |
| let-7                                         | ↓27,617    |            |

## Top Upstream Regulators

### Top My Lists

| Name                                                             | p-value  | Ratio        |
|------------------------------------------------------------------|----------|--------------|
| <a href="#">PreBI vs PreBII L barn_miR_utvidet mRNA_Core TFs</a> | 1,4E-02  | 1/16 (0,062) |
| <a href="#">PreBI vs PreBIIL_miR_adults</a>                      | 1,91E-02 | 1/18 (0,056) |
| <a href="#">PreBI vs PreBII_miR and mRNA_network2_adults</a>     | 3,04E-02 | 1/28 (0,036) |
| <a href="#">PreBI vs PreBIIL_miRs only_adults</a>                | 4,89E-02 | 1/51 (0,02)  |
| <a href="#">PreBI vs PreBIIL_miR_and mRNA_adults</a>             | 5,99E-02 | 1/63 (0,016) |

### Top My Pathways

| Name                                                       | p-value  | Ratio        |
|------------------------------------------------------------|----------|--------------|
| <a href="#">PreBI vs PreBII L_miR og mRNA_core TF_barn</a> | 2,66E-02 | 1/26 (0,038) |
| <a href="#">PreBI vs PreBIIL_miRs and mRNA_voksne</a>      | 6,59E-02 | 1/60 (0,017) |

### Top Tox Lists

| Name | p-value | Ratio |
|------|---------|-------|
|------|---------|-------|

## Top Tox Functions

### Cardiotoxicity

| Name                        | p-value             | # Molecules |
|-----------------------------|---------------------|-------------|
| Cardiac Hypertrophy         | 2,16E-02 - 1,47E-01 | 1           |
| Cardiac Hypoplasia          | 2,79E-02 - 2,79E-02 | 1           |
| Cardiac Necrosis/Cell Death | 3,78E-02 - 3,78E-02 | 1           |
| Cardiac Infarction          | 7,19E-02 - 7,19E-02 | 1           |
| Cardiac Proliferation       | 8,97E-02 - 8,97E-02 | 1           |

### Hepatotoxicity

| Name                                 | p-value             | # Molecules |
|--------------------------------------|---------------------|-------------|
| Liver Hyperplasia/Hyperproliferation | 1,51E-04 - 2,41E-02 | 6           |
| Hepatocellular Carcinoma             | 2,93E-03 - 2,93E-03 | 4           |

### Nephrotoxicity

| Name               | p-value             | # Molecules |
|--------------------|---------------------|-------------|
| Renal Inflammation | 2,43E-04 - 2,43E-04 | 3           |
| Renal Nephritis    | 2,43E-04 - 2,43E-04 | 3           |

Analysis Name: Child PreBII L vs Adult PreBII L\_miR

Analysis Creation Date: 2013-06-09

Build version: 220217

Content version: 16542223 (Release Date: 2013-05-13)

## Analysis settings

[View](#)

Reference set: Ingenuity Knowledge Base (Genes Only)

Relationship to include: Direct and Indirect

Includes Endogenous Chemicals

Optional Analyses: My Pathways My List

Filter Summary:

Consider only molecules and/or relationships where

(species = Rat OR Human OR Mouse) AND

(confidence = Experimentally Observed OR High (predicted))

Cutoff:

## Top Networks

| ID | Associated Network Functions                                                     | Score |
|----|----------------------------------------------------------------------------------|-------|
| 1  | Reproductive System Disease, Inflammatory Disease, Inflammatory Response         | 31    |
| 2  | Reproductive System Disease, Cell Death and Survival, Endocrine System Disorders | 25    |

|   |                                                                                  |   |
|---|----------------------------------------------------------------------------------|---|
| 3 | Embryonic Development, Hair and Skin Development and Function, Organ Development | 3 |
| 4 | Cancer, Reproductive System Disease, Connective Tissue Disorders                 | 3 |

## Top Bio Functions

### Diseases and Disorders

| Name                         | p-value             | # Molecules |
|------------------------------|---------------------|-------------|
| Reproductive System Disease  | 3,06E-15 - 7,78E-04 | 9           |
| Inflammatory Disease         | 2,08E-06 - 9,73E-03 | 5           |
| Inflammatory Response        | 2,08E-06 - 2,08E-06 | 4           |
| Renal and Urological Disease | 2,08E-06 - 4,16E-04 | 6           |
| Cancer                       | 4,75E-06 - 4,85E-02 | 9           |

### Molecular and Cellular Functions

| Name                                   | p-value             | # Molecules |
|----------------------------------------|---------------------|-------------|
| Cell-To-Cell Signaling and Interaction | 9,92E-04 - 9,92E-04 | 1           |
| Cellular Assembly and Organization     | 9,92E-04 - 9,92E-04 | 1           |
| Cellular Function and Maintenance      | 9,92E-04 - 9,92E-04 | 1           |
| Cell Cycle                             | 9,87E-03 - 9,87E-03 | 1           |
| Lipid Metabolism                       | 2,55E-02 - 2,55E-02 | 1           |

### Physiological System Development and Function

| Name                                                  | p-value             | # Molecules |
|-------------------------------------------------------|---------------------|-------------|
| Nervous System Development and Function               | 9,92E-04 - 9,92E-04 | 1           |
| Tissue Development                                    | 9,92E-04 - 9,92E-04 | 1           |
| Cardiovascular System Development and Function        | 1,98E-03 - 1,98E-03 | 1           |
| Skeletal and Muscular System Development and Function | 1,98E-03 - 1,98E-03 | 1           |
| Tissue Morphology                                     | 1,98E-03 - 1,98E-03 | 1           |



## Top Canonical Pathways

| Name | p-value | Ratio |
|------|---------|-------|
|------|---------|-------|

## Top Molecules

## Fold Change up-regulated

| Molecules                                                      | Exp. Value | Exp. Chart |
|----------------------------------------------------------------|------------|------------|
| <a href="#">miR-374b-3p (miRNAs w/seed UUAGCAG)</a>            | ↑60,863    |            |
| <a href="#">miR-129-1-3p (and other miRNAs w/seed AGCCCUU)</a> | ↑27,954    |            |
| <a href="#">miR-551b-3p (and other miRNAs w/seed CGACCCA)</a>  | ↑17,722    |            |
| <a href="#">miR-20b-3p (miRNAs w/seed CUGUAGU)</a>             | ↑14,099    |            |
| <a href="#">miR-574-3p (miRNAs w/seed ACGCUCA)</a>             | ↑9,126     |            |

## Fold Change down-regulated

| Molecules                                                     | Exp. Value | Exp. Chart |
|---------------------------------------------------------------|------------|------------|
| <a href="#">miR-1 (and other miRNAs w/seed GGAAUGU)</a>       | ↓39,877    |            |
| <a href="#">miR-657 (miRNAs w/seed GCAGGUU)</a>               | ↓37,336    |            |
| <a href="#">miR-326-5p (and other miRNAs w/seed GGGGCAG)</a>  | ↓30,169    |            |
| <a href="#">miR-198 (miRNAs w/seed GUCCAGA)</a>               | ↓24,718    |            |
| <a href="#">miR-545-3p (miRNAs w/seed CAGCAAA)</a>            | ↓22,549    |            |
| <a href="#">miR-193a-3p (and other miRNAs w/seed ACUGGCC)</a> | ↓17,119    |            |
| <a href="#">miR-638 (miRNAs w/seed GGGAUCG)</a>               | ↓16,912    |            |
| <a href="#">miR-383 (and other miRNAs w/seed GAUCAGA)</a>     | ↓15,616    |            |
| <a href="#">miR-495-3p (and other miRNAs w/seed AACAAAC)</a>  | ↓13,086    |            |
| <a href="#">miR-377-3p (miRNAs w/seed UCACACA)</a>            | ↓12,597    |            |

**Top Upstream Regulators**

### Top My Lists

| Name                                                               | p-value  | Ratio        |
|--------------------------------------------------------------------|----------|--------------|
| <a href="#">PreBI vs PreBII_miR_adults</a>                         | 1,48E-02 | 1/18 (0,056) |
| <a href="#">PreBI vs PreBII_miR and mRNA_network2_adults</a>       | 2,35E-02 | 1/28 (0,036) |
| <a href="#">PreBI vs PreBII_miRs only_adults</a>                   | 3,8E-02  | 1/51 (0,02)  |
| <a href="#">PreBI vs PreBII_miR and mRNA_adults</a>                | 4,66E-02 | 1/63 (0,016) |
| <a href="#">PreBI vs PreBII_miR target filter_cell cycle_ID2_c</a> | 4,75E-02 | 1/51 (0,02)  |

### Top My Pathways

| Name                                                 | p-value  | Ratio        |
|------------------------------------------------------|----------|--------------|
| <a href="#">PreBI vs PreBII_miRs and mRNA_voksne</a> | 5,13E-02 | 1/60 (0,017) |

### Top Tox Lists

| Name | p-value | Ratio |
|------|---------|-------|
|------|---------|-------|

## Top Tox Functions

### Cardiotoxicity

| Name                 | p-value             | # Molecules |
|----------------------|---------------------|-------------|
| Cardiac Infarction   | 5,60E-02 - 5,60E-02 | 1           |
| Cardiac Hypertrophy  | 1,15E-01 - 1,15E-01 | 1           |
| Cardiac Arrythmia    | 1,69E-01 - 1,69E-01 | 1           |
| Cardiac Arteriopathy | 2,56E-01 - 2,56E-01 | 1           |

### Hepatotoxicity

| Name                                 | p-value             | # Molecules |
|--------------------------------------|---------------------|-------------|
| Liver Hyperplasia/Hyperproliferation | 2,67E-02 - 8,01E-02 | 3           |
| Hepatocellular Carcinoma             | 8,01E-02 - 8,01E-02 | 2           |

### Nephrotoxicity

| Name               | p-value             | # Molecules |
|--------------------|---------------------|-------------|
| Renal Inflammation | 2,08E-06 - 2,08E-06 | 4           |
| Renal Nephritis    | 2,08E-06 - 2,08E-06 | 4           |

Analysis Name: Child PreBII s vs Adult PreBII s\_miR

Analysis Creation Date: 2013-06-09

Build version: 220217

Content version: 16542223 (Release Date: 2013-05-13)

## Analysis settings

[View](#)

Reference set: Ingenuity Knowledge Base (Genes + Endogenous Chemicals)

Relationship to include: Direct and Indirect

Includes Endogenous Chemicals

Optional Analyses: My Pathways My List

Filter Summary:

Consider only molecules and/or relationships where

(species = Rat OR Human OR Mouse) AND

(confidence = Experimentally Observed OR High (predicted))

Cutoff:

## Top Networks

| ID | Associated Network Functions                                                 | Score |
|----|------------------------------------------------------------------------------|-------|
| 1  | Developmental Disorder, Hereditary Disorder, Skeletal and Muscular Disorders | 31    |
| 2  | Cancer, Gastrointestinal Disease, Developmental Disorder                     | 31    |

|   |                                                                          |    |
|---|--------------------------------------------------------------------------|----|
| 3 | Cancer, Gastrointestinal Disease, Cellular Development                   | 26 |
| 4 | Cellular Movement, Cancer, Reproductive System Disease                   | 11 |
| 5 | Connective Tissue Disorders, Inflammatory Disease, Inflammatory Response | 2  |

## Top Bio Functions

### Diseases and Disorders

| Name                            | p-value             | # Molecules |
|---------------------------------|---------------------|-------------|
| Hereditary Disorder             | 1,82E-17 - 4,52E-02 | 12          |
| Skeletal and Muscular Disorders | 1,82E-17 - 6,29E-03 | 11          |
| Endocrine System Disorders      | 1,14E-16 - 3,16E-02 | 13          |
| Reproductive System Disease     | 1,14E-16 - 3,11E-02 | 23          |
| Developmental Disorder          | 1,44E-16 - 2,29E-02 | 11          |

### Molecular and Cellular Functions

| Name                              | p-value             | # Molecules |
|-----------------------------------|---------------------|-------------|
| Cellular Movement                 | 3,08E-05 - 3,18E-02 | 8           |
| Cellular Development              | 6,40E-05 - 4,94E-02 | 9           |
| Cellular Growth and Proliferation | 6,40E-05 - 4,74E-02 | 9           |
| Cell Death and Survival           | 1,13E-03 - 4,12E-02 | 7           |
| Cell Cycle                        | 6,29E-03 - 4,68E-02 | 4           |

### Physiological System Development and Function

| Name                                           | p-value             | # Molecules |
|------------------------------------------------|---------------------|-------------|
| Tumor Morphology                               | 6,40E-05 - 4,74E-02 | 7           |
| Organismal Development                         | 1,53E-04 - 4,72E-02 | 5           |
| Cardiovascular System Development and Function | 2,04E-03 - 4,72E-02 | 5           |
| Embryonic Development                          | 2,10E-03 - 4,72E-02 | 1           |
| Hair and Skin Development and Function         | 2,10E-03 - 2,10E-03 | 1           |

## Top Canonical Pathways

| Name                                                        | p-value  | Ratio         |
|-------------------------------------------------------------|----------|---------------|
| Regulation of the Epithelial-Mesenchymal Transition Pathway | 5,53E-02 | 2/190 (0,011) |

## Top Molecules

## Fold Change up-regulated

| Molecules                                    | Exp. Value | Exp. Chart |
|----------------------------------------------|------------|------------|
| mir-210                                      | ↑639,145   |            |
| miR-34a-3p (miRNAs w/seed AAUCAGC)           | ↑249,000   |            |
| mir-149                                      | ↑129,787   |            |
| mir-27                                       | ↑114,365   |            |
| miR-7-1-3p (and other miRNAs w/seed AACAAAU) | ↑85,925    |            |
| miR-331-5p (miRNAs w/seed UAGGUAU)           | ↑59,714    |            |
| miR-455-3p (miRNAs w/seed CAGUCCA)           | ↑59,404    |            |
| mir-657                                      | ↑42,740    |            |
| miR-744-3p (miRNAs w/seed UGUUGCC)           | ↑36,190    |            |
| miR-148b-5p (miRNAs w/seed AGUUCUG)          | ↑34,836    |            |

## Fold Change down-regulated

| Molecules                                     | Exp. Value | Exp. Chart |
|-----------------------------------------------|------------|------------|
| mir-145                                       | ↓31,724    |            |
| miR-125b-5p (and other miRNAs w/seed CCCUGAG) | ↓21,593    |            |

## Top Upstream Regulators





### Top My Lists

| Name                                                             | p-value  | Ratio        |
|------------------------------------------------------------------|----------|--------------|
| <a href="#">PreBI vs PreBII L barn_miR_utvidet mRNA_Core TFs</a> | 2,29E-02 | 1/16 (0,062) |
| <a href="#">PreBI vs PreBII L_miR_adults</a>                     | 3,11E-02 | 2/18 (0,111) |
| <a href="#">PreBI vs PreBII_miR and mRNA_network2_adults</a>     | 4,92E-02 | 2/28 (0,071) |
| <a href="#">PreBI vs PreBII L_miRs only_adults</a>               | 7,88E-02 | 2/51 (0,039) |
| <a href="#">PreBI vs PreBII L_miR_and mRNA_adults</a>            | 9,61E-02 | 2/63 (0,032) |

### Top My Pathways

| Name                                                       | p-value  | Ratio        |
|------------------------------------------------------------|----------|--------------|
| <a href="#">PreBI vs PreBII L_miR og mRNA_core TF_barn</a> | 4,32E-02 | 1/26 (0,038) |
| <a href="#">PreBI vs PreBII L_miRs and mRNA_voksne</a>     | 1,06E-01 | 2/60 (0,033) |

### Top Tox Lists

| Name                                          | p-value  | Ratio         |
|-----------------------------------------------|----------|---------------|
| <a href="#">Increases Renal Proliferation</a> | 2,22E-01 | 1/119 (0,008) |
| <a href="#">Cardiac Hypertrophy</a>           | 5,18E-01 | 1/344 (0,003) |

## Top Tox Functions

### Cardiotoxicity

| Name                     | p-value             | # Molecules |
|--------------------------|---------------------|-------------|
| Congenital Heart Anomaly | 2,29E-02 - 2,29E-02 | 1           |
| Cardiac Fibrosis         | 2,15E-01 - 2,15E-01 | 1           |
| Cardiac Hypertrophy      | 4,01E-01 - 4,01E-01 | 1           |
| Heart Failure            | 4,06E-01 - 4,06E-01 | 1           |

### Hepatotoxicity

| Name                                 | p-value             | # Molecules |
|--------------------------------------|---------------------|-------------|
| Liver Hyperplasia/Hyperproliferation | 7,25E-08 - 5,24E-06 | 11          |
| Hepatocellular Carcinoma             | 5,24E-06 - 5,24E-06 | 8           |
| Liver Steatosis                      | 9,23E-02 - 9,23E-02 | 1           |

### Nephrotoxicity

| Name                | p-value             | # Molecules |
|---------------------|---------------------|-------------|
| Renal Inflammation  | 1,73E-02 - 1,73E-02 | 2           |
| Renal Nephritis     | 1,73E-02 - 1,73E-02 | 2           |
| Renal Proliferation | 2,97E-01 - 2,97E-01 | 1           |

Analysis Name: Child Immature B vs Adult Immature B\_miR

Analysis Creation Date: 2013-06-09

Build version: 220217

Content version: 16542223 (Release Date: 2013-05-13)

## Analysis settings

[View](#)

Reference set: Ingenuity Knowledge Base (Genes + Endogenous Chemicals)

Relationship to include: Direct and Indirect

Includes Endogenous Chemicals

Optional Analyses: My Pathways My List

Filter Summary:

Consider only molecules and/or relationships where

(species = Rat OR Human OR Mouse) AND

(confidence = Experimentally Observed OR High (predicted))

Cutoff:

## Top Networks

| ID | Associated Network Functions                                                 | Score |
|----|------------------------------------------------------------------------------|-------|
| 1  | Cancer, Cellular Development, Cellular Growth and Proliferation              | 23    |
| 2  | Hereditary Disorder, Skeletal and Muscular Disorders, Developmental Disorder | 20    |

|   |                                                                                  |    |
|---|----------------------------------------------------------------------------------|----|
| 3 | Connective Tissue Disorders, Inflammatory Disease, Inflammatory Response         | 15 |
| 4 | Embryonic Development, Hair and Skin Development and Function, Organ Development | 2  |
| 5 | Developmental Disorder, Hereditary Disorder, Skeletal and Muscular Disorders     | 2  |

## Top Bio Functions

### Diseases and Disorders

| Name                            | p-value             | # Molecules |
|---------------------------------|---------------------|-------------|
| Reproductive System Disease     | 3,69E-13 - 2,48E-02 | 16          |
| Hereditary Disorder             | 1,03E-11 - 3,08E-02 | 10          |
| Skeletal and Muscular Disorders | 1,03E-11 - 2,55E-02 | 8           |
| Developmental Disorder          | 3,84E-11 - 3,08E-02 | 7           |
| Endocrine System Disorders      | 4,47E-07 - 2,25E-02 | 8           |

### Molecular and Cellular Functions

| Name                                   | p-value             | # Molecules |
|----------------------------------------|---------------------|-------------|
| Cell Death and Survival                | 1,52E-03 - 4,16E-02 | 4           |
| Cell Morphology                        | 1,52E-03 - 1,52E-03 | 1           |
| Cell-To-Cell Signaling and Interaction | 1,52E-03 - 4,74E-02 | 4           |
| Cellular Function and Maintenance      | 1,52E-03 - 4,74E-02 | 3           |
| Cellular Growth and Proliferation      | 1,52E-03 - 4,89E-02 | 5           |

### Physiological System Development and Function

| Name                                                  | p-value             | # Molecules |
|-------------------------------------------------------|---------------------|-------------|
| Cardiovascular System Development and Function        | 1,52E-03 - 4,74E-02 | 3           |
| Tissue Development                                    | 1,52E-03 - 3,87E-02 | 2           |
| Hematological System Development and Function         | 9,07E-03 - 2,70E-02 | 3           |
| Hematopoiesis                                         | 9,07E-03 - 2,70E-02 | 2           |
| Skeletal and Muscular System Development and Function | 9,07E-03 - 4,89E-02 | 2           |

## Top Canonical Pathways

| Name | p-value | Ratio |
|------|---------|-------|
|------|---------|-------|

## Top Molecules

## Fold Change up-regulated

| Molecules                          | Exp. Value | Exp. Chart |
|------------------------------------|------------|------------|
| miR-455-3p (miRNAs w/seed CAGUCCA) | ↑52,985    |            |

## Fold Change down-regulated

| Molecules                                     | Exp. Value | Exp. Chart |
|-----------------------------------------------|------------|------------|
| miR-876-5p (and other miRNAs w/seed GGAUUUC)  | ↓-118,193  |            |
| miR-335-3p (miRNAs w/seed UUUUCAU)            | ↓-96,169   |            |
| mir-636                                       | ↓-71,630   |            |
| mir-214                                       | ↓-61,287   |            |
| mir-145                                       | ↓-47,095   |            |
| mir-489                                       | ↓-39,124   |            |
| miR-125b-5p (and other miRNAs w/seed CCCUGAG) | ↓-38,854   |            |
| mir-588                                       | ↓-36,002   |            |
| miR-511 (miRNAs w/seed UGUCUUU)               | ↓-34,237   |            |
| MIR659                                        | ↓-27,096   |            |

## Top Upstream Regulators

## Top My Lists

| Name                                             | p-value  | Ratio        |
|--------------------------------------------------|----------|--------------|
| PreBI vs PreBIIL_miRs only_adults                | 1,58E-03 | 2/51 (0,039) |
| PreBI vs PreBII L barn_miR_utvidet mRNA_Core TFs | 1,66E-02 | 1/16 (0,062) |
| PreBI vs PreBIIL_miR_adults                      | 2,25E-02 | 1/18 (0,056) |
| PreBI vs PreBII_miR and mRNA_network2_adults     | 3,58E-02 | 1/28 (0,036) |
| PreBI vs PreBIIL_miR_and mRNA_adults             | 7,04E-02 | 1/63 (0,016) |

## Top My Pathways

| Name                                       | p-value  | Ratio        |
|--------------------------------------------|----------|--------------|
| PreBI vs PreBII L_miR og mRNA_core TF_barn | 3,14E-02 | 1/26 (0,038) |
| PreBI vs PreBIIL_miRs and mRNA_voksne      | 7,74E-02 | 1/60 (0,017) |

## Top Tox Lists

| Name | p-value | Ratio |
|------|---------|-------|
|------|---------|-------|



## Top Tox Functions

### Cardiotoxicity

| Name             | p-value             | # Molecules |
|------------------|---------------------|-------------|
| Cardiac Damage   | 7,56E-03 - 7,56E-03 | 1           |
| Cardiac Fibrosis | 1,61E-01 - 1,61E-01 | 1           |

### Hepatotoxicity

| Name                                 | p-value             | # Molecules |
|--------------------------------------|---------------------|-------------|
| Liver Hyperplasia/Hyperproliferation | 4,07E-04 - 3,48E-02 | 6           |
| Hepatocellular Carcinoma             | 3,48E-02 - 3,48E-02 | 3           |
| Liver Steatosis                      | 6,75E-02 - 6,75E-02 | 1           |

### Nephrotoxicity

| Name               | p-value             | # Molecules |
|--------------------|---------------------|-------------|
| Renal Inflammation | 1,36E-01 - 1,36E-01 | 1           |
| Renal Nephritis    | 1,36E-01 - 1,36E-01 | 1           |
